# Supplementary material
Source: PubMed Central journal article supplement (PMC4789868)

**Figure A1. Symptomatic deep vein thrombosis.**

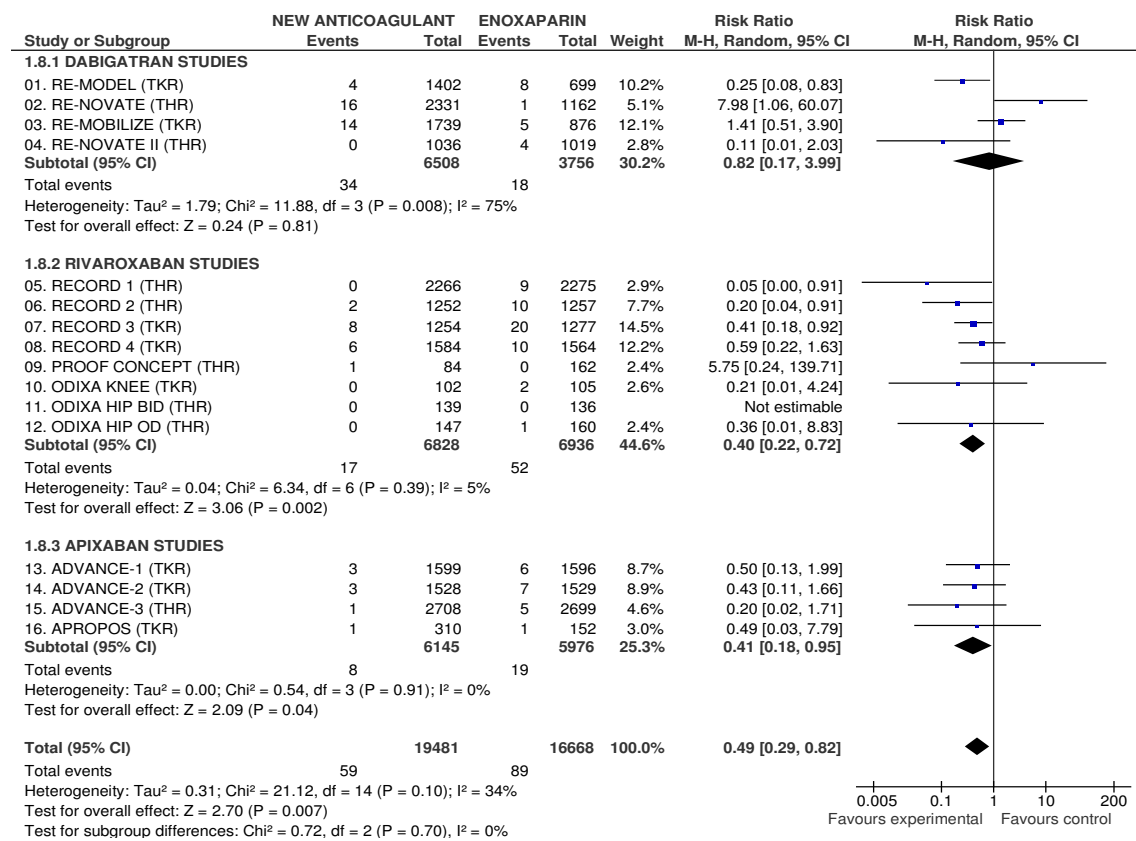

**Figure A2. Symptomatic pulmonary embolism.**

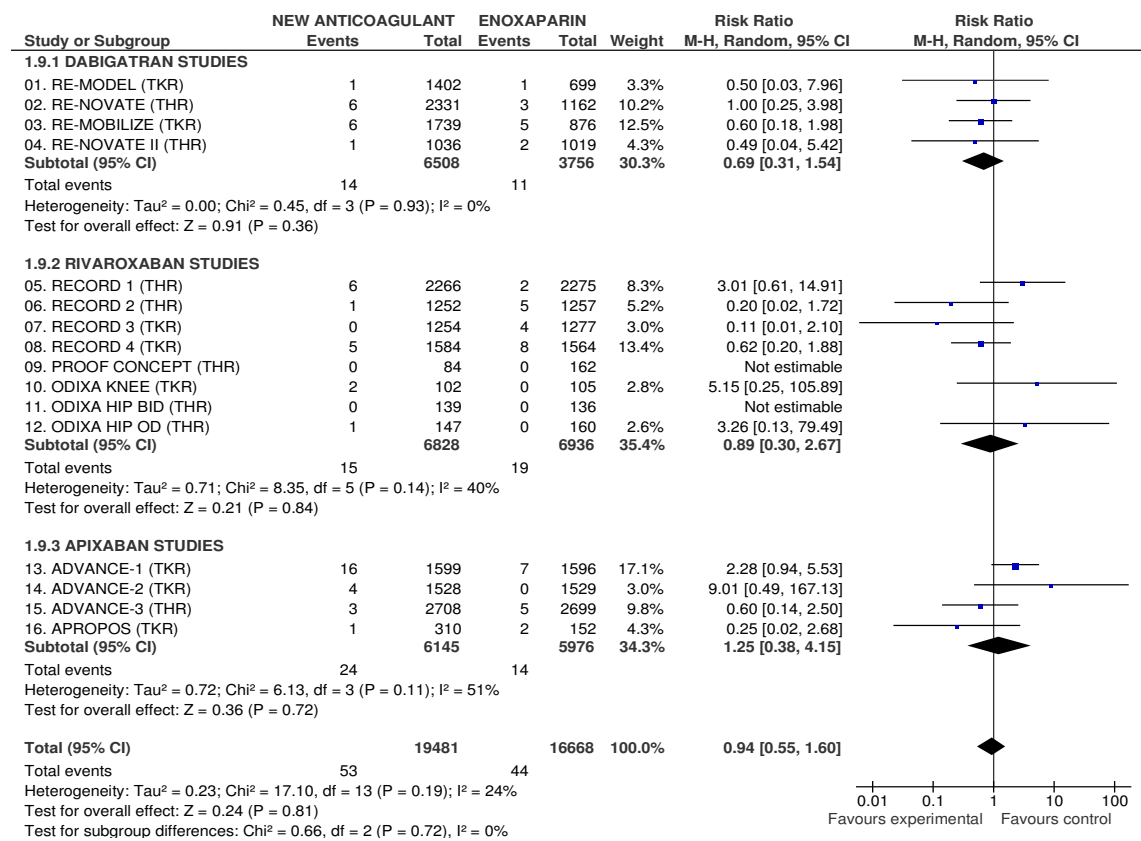

**Figure A3. Symptomatic pulmonary embolism. Knee pivotal studies. Apixaban**

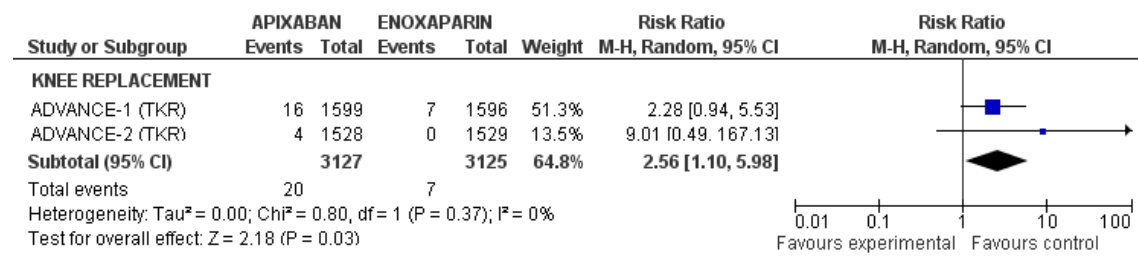

**Figure A4. Total venous thromboembolism and/or all-cause mortality.**

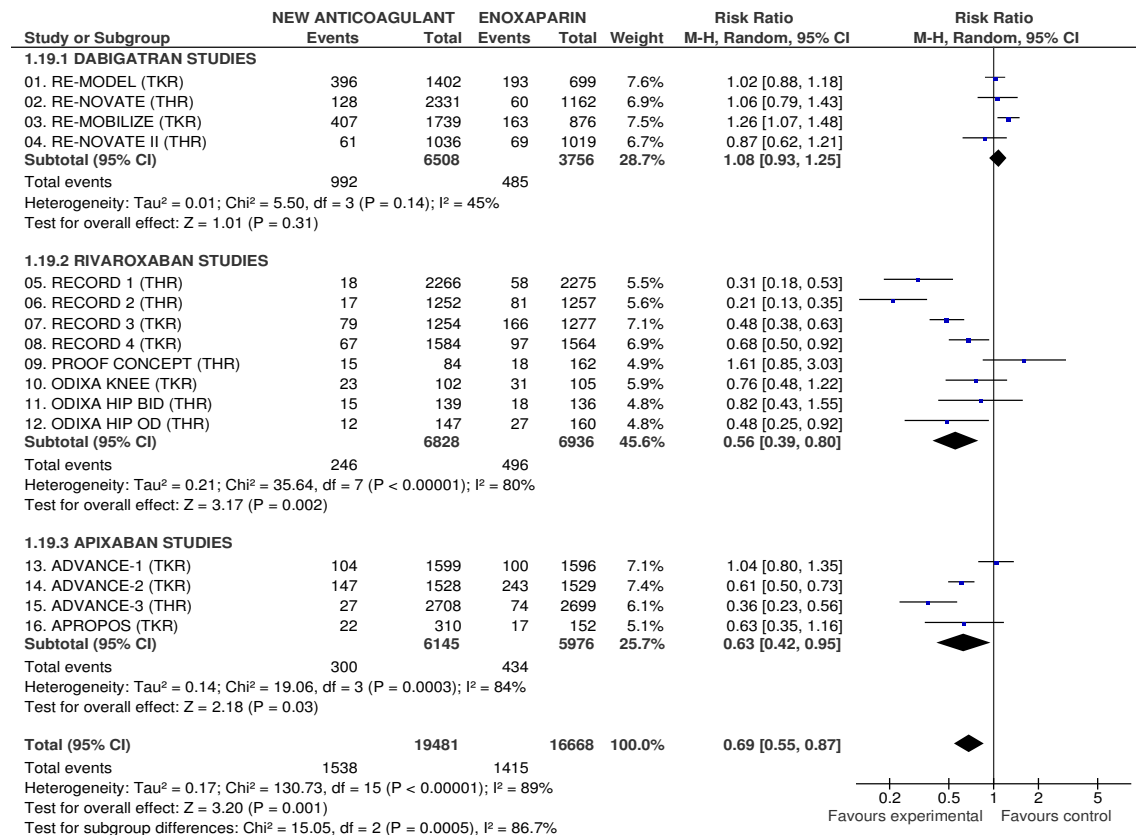

**Figure A5. Total venous thromboembolism and/or all-cause mortality by dabigatran dose.**

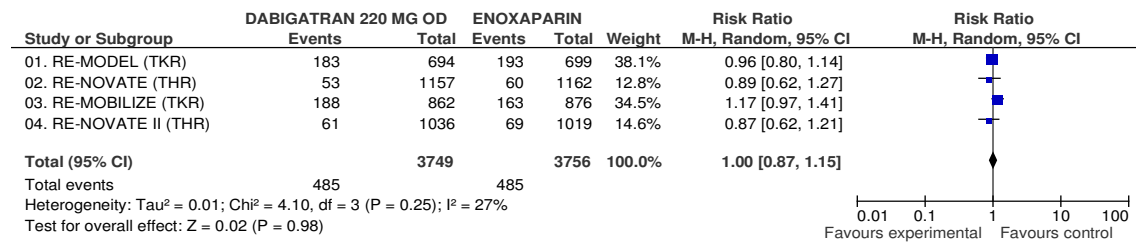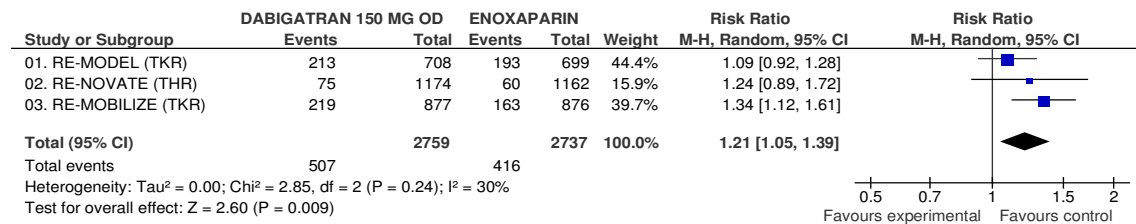

**Figure A6. Major venous thromboembolism and/or venous thromboembolism-related deaths.**

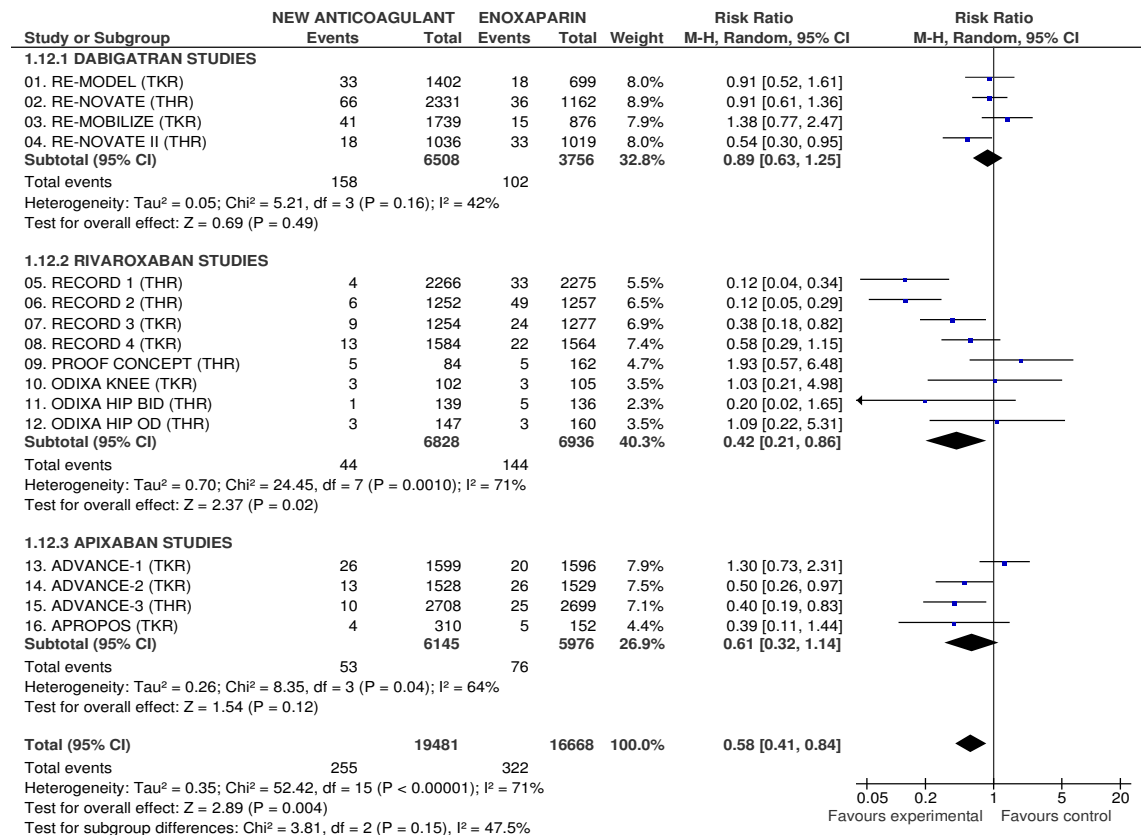

**Figure A7. Major venous thromboembolism and/or venous thromboembolism-related deaths by dabigatran dose**

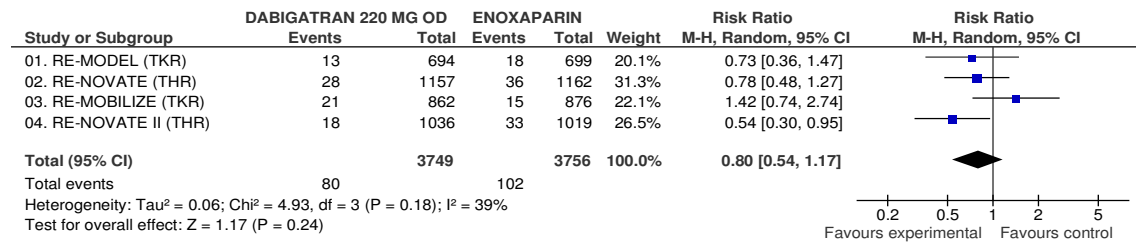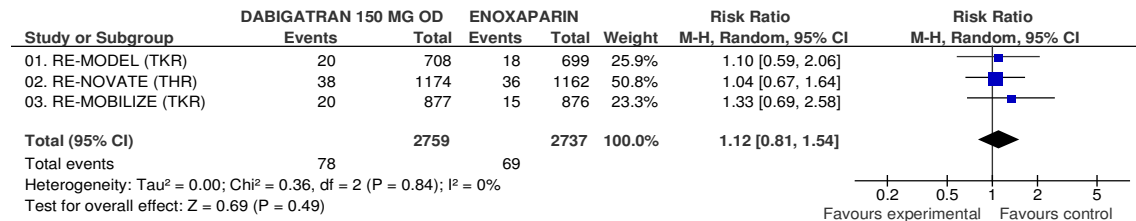

Supplement: goma002058.wf1_default.pdf [file goma002058.wf1_default.pdf]
