# Supplementary material
Source: PubMed Central journal article supplement (PMC4789868)
Supplement: goma002058.wt2_default.pdf [file goma002058.wt2_default.pdf]

**Table A5. Sensitivity analyses of indirect comparisons: Symptomatic venous thromboembolism, clinically relevant bleeding and net clinical endpoint using the fixed effects model.**

| OUTCOME                                   | RIV vs. DAB         | API vs. DAB         | RIV vs. API         |
|-------------------------------------------|---------------------|---------------------|---------------------|
|                                           | RR (95% CI)         | RR (95% CI)         | RR (95% CI)         |
| <b>Symptomatic venous thromboembolism</b> | 0.53 (0.29 to 0.99) | 1.05 (0.53 to 2.05) | 0.51 (0.27 to 0.96) |
| <b>Clinically relevant bleeding</b>       | 1.12 (0.87 to 1.43) | 0.73 (0.57 to 0.93) | 1.54 (1.21 to 1.95) |
| <b>Net clinical endpoint</b>              | 0.92 (0.65 to 1.30) | 0.95 (0.63 to 1.42) | 0.97 (0.67 to 1.39) |

API = apixaban; CI = confidence interval; DAB = dabigatran; RIV = rivaroxaban; RR = relative risk.

**Table A6. Sensitivity analyses of indirect comparisons: Symptomatic venous thromboembolism, clinically relevant bleeding and net clinical endpoint excluding phase II trials.**

| OUTCOME                                   | RIV vs. DAB         | API vs. DAB         | RIV vs. API         |
|-------------------------------------------|---------------------|---------------------|---------------------|
|                                           | RR (95% CI)         | RR (95% CI)         | RR (95% CI)         |
| <b>Symptomatic venous thromboembolism</b> | 0.47 (0.25 to 0.88) | 1.14 (0.57 to 2.27) | 0.41 (0.21 to 0.80) |
| <b>Clinically relevant bleeding</b>       | 1.12 (0.87 to 1.44) | 0.73 (0.56 to 0.93) | 1.54 (1.20 to 1.96) |
| <b>Net clinical endpoint</b>              | 0.91 (0.64 to 1.29) | 0.94 (0.62 to 1.41) | 0.97 (0.67 to 1.40) |

API = apixaban; CI = confidence interval; DAB = dabigatran; RIV = rivaroxaban; RR = relative risk.

**Table A7. Symptomatic venous thromboembolism, clinically relevant bleeding and net clinical endpoint excluding the RECORD-2 study.**

| OUTCOME                                   | RIV vs. DAB         | API vs. DAB         | RIV vs. API         |
|-------------------------------------------|---------------------|---------------------|---------------------|
|                                           | RR (95% CI)         | RR (95% CI)         | RR (95% CI)         |
| <b>Symptomatic venous thromboembolism</b> | 0.61 (0.32 to 1.17) | 1.16 (0.31 to 4.28) | 0.59 (0.32 to 1.07) |
| <b>Clinically relevant bleeding</b>       | 1.12 (0.87 to 1.45) | 0.73 (0.57 to 0.94) | 1.55 (1.21 to 1.99) |
| <b>Net clinical endpoint</b>              | 0.98 (0.68 to 1.41) | 0.99 (0.61 to 1.61) | 1.03 (0.71 to 1.51) |

API = apixaban; CI = confidence interval; DAB = dabigatran; RIV = rivaroxaban; RR = relative risk.
