# Supplementary material
Source: PubMed Central journal article supplement (PMC4789868)
Supplement: goma002058.ww1_default.pdf [file goma002058.ww1_default.pdf]

## **SUPPLEMENTARY APPENDIX: DETAILS OF THE BIBLIOGRAPHIC SEARCH:**

### **1) Main bibliographic search:**

#### **1a. MEDLINE:**

<http://www.ncbi.nlm.nih.gov/pubmed>

**Search:** "Terms: rivaroxaban and/or BAY 59-7939 and/or dabigatran and/or BIBR-1048 and/or apixaban and/or BMS-562247."; "Limits Activated: Publication Date: from 2000/01/01 to 2011/04/15."

**Results:** 606 articles, 71 of them were related with clinical trials, 19 of them were clinical trials in hip or knee replacement. Of them, 16 were included and 3 excluded.

#### **1b. CENTRAL:**

[http://onlinelibrary.wiley.com/o/cochrane/cochrane\\_clcentral\\_articles\\_fs.html](http://onlinelibrary.wiley.com/o/cochrane/cochrane_clcentral_articles_fs.html)

**Search:** "Terms: rivaroxaban or BAY 59-7939 or dabigatran or apixaban and/or BMS-562247 (Search All Text)."; "Limits Activated: Data range from 2000 to 2011."

**Results:** 57 articles (no additional clinical trials to those identified through MEDLINE were found).

### **2) Additional bibliographic search:**

(no additional clinical trials to those identified through the main bibliographic search were found with the additional bibliographic search).

#### **2a. Regulatory Authorities:**

##### **Food and Drug Administration (FDA):**

[www.accessdata.fda.gov/scripts/cder/drugsatfda](http://www.accessdata.fda.gov/scripts/cder/drugsatfda)

**European Medicines Agency (EMA):**

[www.ema.europa.eu](http://www.ema.europa.eu)

**2b. Clinical trials websites:**

**Clinicaltrials.gov Registry (“U.S. National Institute of Health”):**

[www.clinicaltrials.gov](http://www.clinicaltrials.gov)

**Boehringer-Ingelheim clinical trial register website (dabigatran studies):**

<http://trials.boehringer-ingelheim.com/com/Home/TrialResults>

**Bayer Healthcare clinical trial register website (rivaroxaban studies):**

[www.bayerhealthcare.com/scripts/pages/en/research\\_development/clinical\\_trials/trial\\_finder/index.php](http://www.bayerhealthcare.com/scripts/pages/en/research_development/clinical_trials/trial_finder/index.php)

**Bristol Myers Squibb clinical trial register website (apixaban studies):**

[www.bms.com/clinical\\_trials/Pages/clinical\\_trial\\_registry.aspx](http://www.bms.com/clinical_trials/Pages/clinical_trial_registry.aspx)

**2c. Abstracts from international congresses:**

**International Society of Thrombosis and Hemostasis (ISTH):**

**2003:** <http://www.blackwellpublishing.com/isth2003/>

**2005:** <http://www.blackwellpublishing.com/isth2005/>

**2007:** <http://www.blackwellpublishing.com/isth2007/>

**2009:** <http://www.blackwellpublishing.com/isth2009/>

**Mediterranean League Against Thromboembolic Diseases (MLTD):**

**2002:**

<http://content.karger.com/ProdukteDB/produkte.asp?Aktion=showproducts&searchWhat=books&ProduktNr=228990>

**2003/2004:**

<http://content.karger.com/ProdukteDB/produkte.asp?Aktion=Ausgabe&Ausgabe=230746&ProduktNr=224034>

**2006:**

<http://content.karger.com/ProdukteDB/produkte.asp?Aktion=Ausgabe&Ausgabe=231987&ProduktNr=224034>

**2007/2008:**

<http://content.karger.com/ProdukteDB/produkte.asp?Aktion=Ausgabe&Ausgabe=239053&ProduktNr=224034>

**2009/2010:**

<http://content.karger.com/ProdukteDB/produkte.asp?Aktion=Ausgabe&Ausgabe=254413&ProduktNr=224034>

**American Society of Hematology (ASH):**

**2004:** <http://abstracts.hematologylibrary.org/content/vol104/issue11/>

**2005:** <http://abstracts.hematologylibrary.org/content/vol106/issue11/>

**2006:** <http://abstracts.hematologylibrary.org/content/vol108/issue11/>

**2007:** <http://abstracts.hematologylibrary.org/content/vol110/issue11/>

**2008:** <http://abstracts.hematologylibrary.org/content/vol112/issue11/>

**2009:** <http://abstracts.hematologylibrary.org/content/vol114/issue22/>

**2010:** <http://abstracts.hematologylibrary.org/content/vol116/issue21/>

**American Academy of Orthopedic Surgeons (AAOS):**

**2008:** <http://www3.aaos.org/education/anmeet/anmt2008/education.cfm>

**2009:** [http://www.aaos.org/education/anmeet/programs/proceedings\\_book.pdf](http://www.aaos.org/education/anmeet/programs/proceedings_book.pdf)

**2010:** <http://www3.aaos.org/education/anmeet/anmt2010/proceedings.pdf>

**American College of Cardiology (ACC) Annual Scientific Sessions:**

**2006:** [http://content.onlinejacc.org/content/vol47/4\\_Suppl\\_A/](http://content.onlinejacc.org/content/vol47/4_Suppl_A/)

**2007:** [http://content.onlinejacc.org/content/vol49/9\\_Suppl\\_A/](http://content.onlinejacc.org/content/vol49/9_Suppl_A/)

**2008:** [http://content.onlinejacc.org/content/vol51/10\\_Suppl\\_A/](http://content.onlinejacc.org/content/vol51/10_Suppl_A/)

**2009:** [http://content.onlinejacc.org/content/vol53/10\\_Suppl\\_A/](http://content.onlinejacc.org/content/vol53/10_Suppl_A/)

**2010:** [http://content.onlinejacc.org/content/vol55/10\\_MeetingAbstracts/](http://content.onlinejacc.org/content/vol55/10_MeetingAbstracts/)

**American Heart Association (AHA) Scientific Sessions:**

**2007:** [http://circ.ahajournals.org/content/vol116/16\\_MeetingAbstracts/](http://circ.ahajournals.org/content/vol116/16_MeetingAbstracts/)

**2008:** [http://circ.ahajournals.org/content/vol118/18\\_MeetingAbstracts/](http://circ.ahajournals.org/content/vol118/18_MeetingAbstracts/)

**2009:** [http://circ.ahajournals.org/content/vol120/18\\_MeetingAbstracts/](http://circ.ahajournals.org/content/vol120/18_MeetingAbstracts/)

**2010:** [http://circ.ahajournals.org/content/vol122/21\\_MeetingAbstracts/](http://circ.ahajournals.org/content/vol122/21_MeetingAbstracts/)
