# Supplementary material
Source: PubMed Central journal article supplement (PMC4789868)

**Figure A8. Major bleeding.**

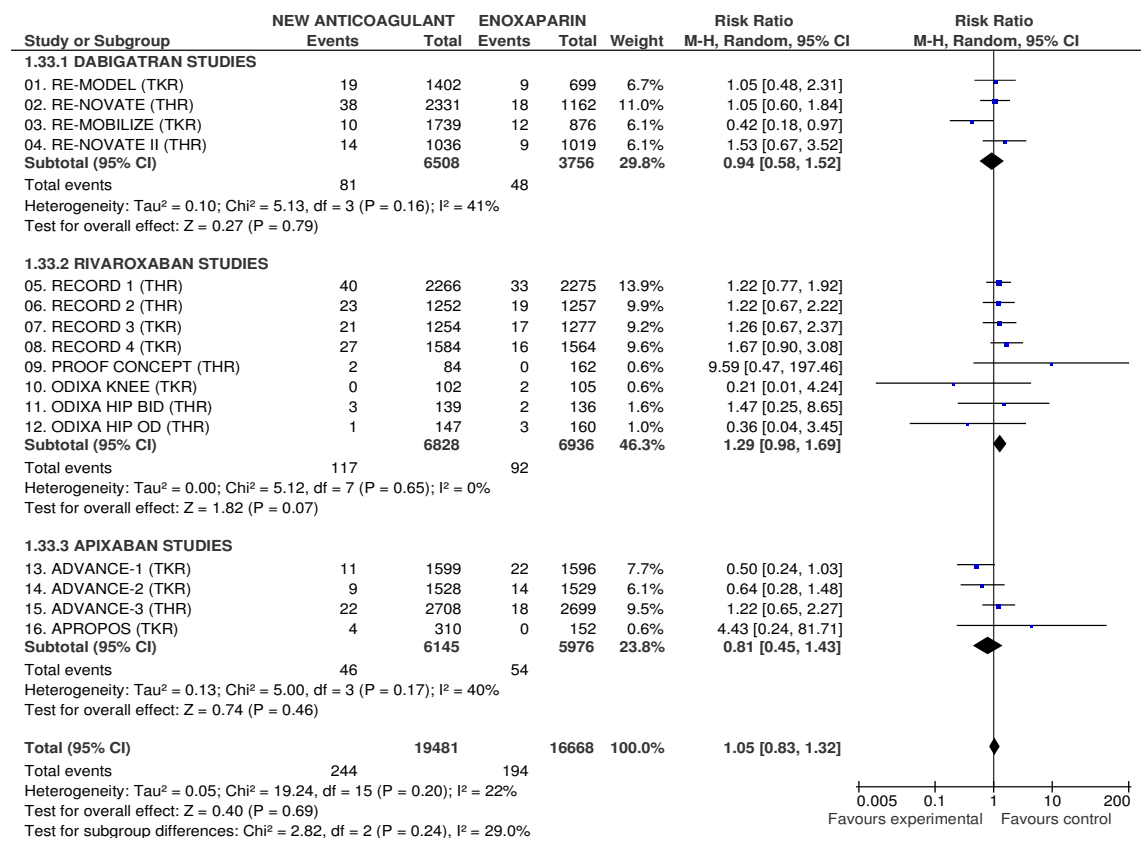

**Figure A9. Clinically relevant minor bleeding.**

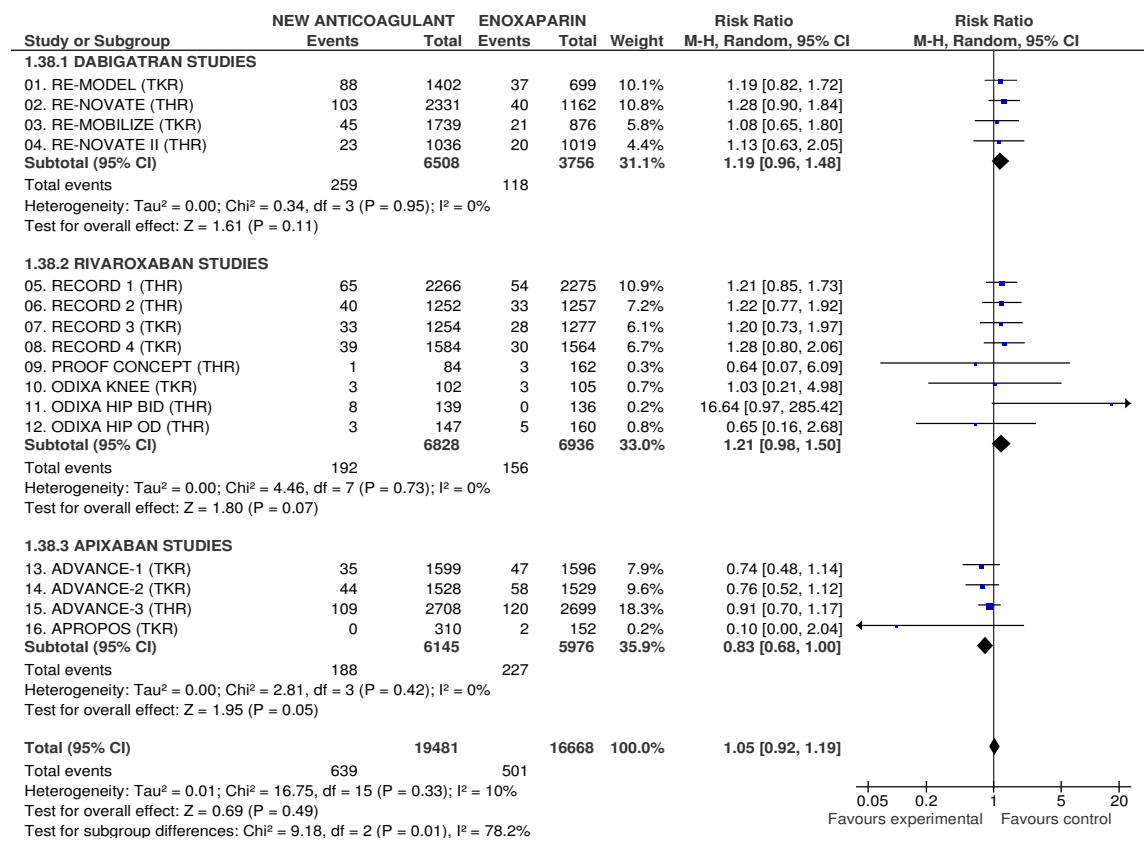

**Figure A10. Mortality.**

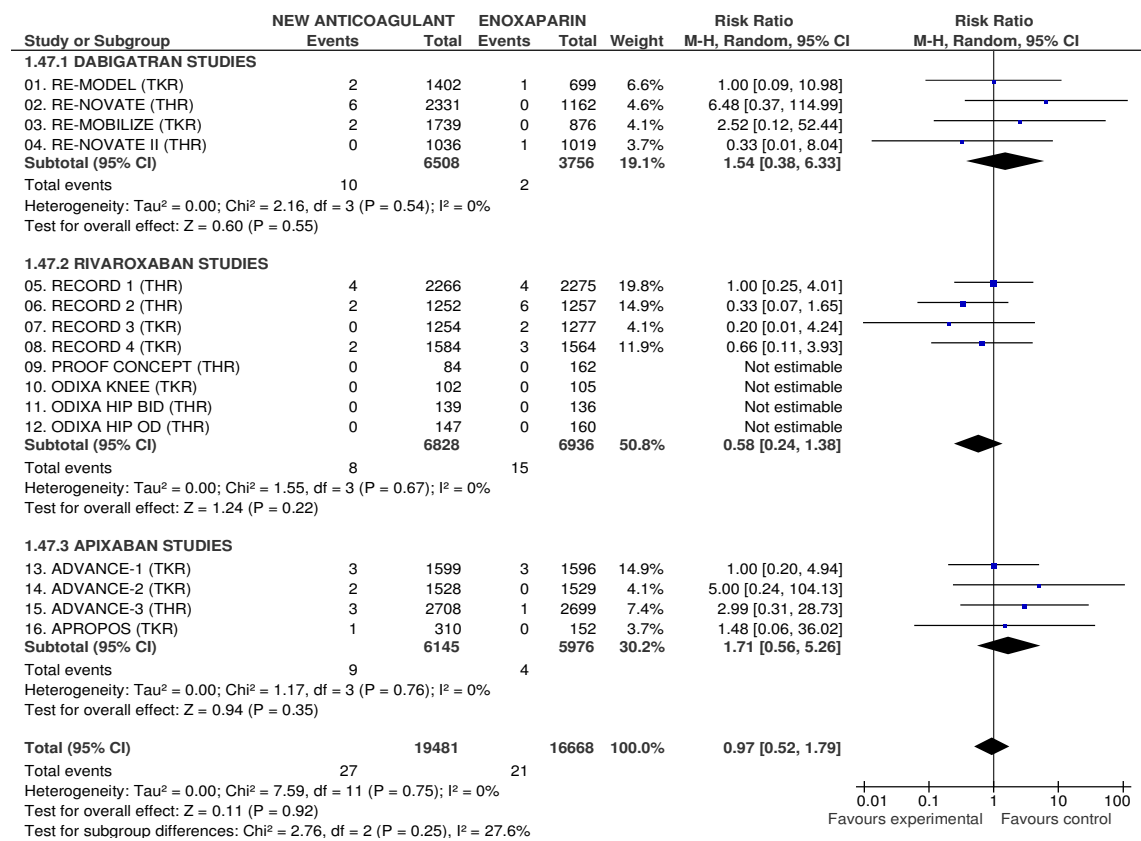

Supplement: goma002058.wf2_default.pdf [file goma002058.wf2_default.pdf]

Figure A11. Analysis of publication bias for the main efficacy and safety outcomes.

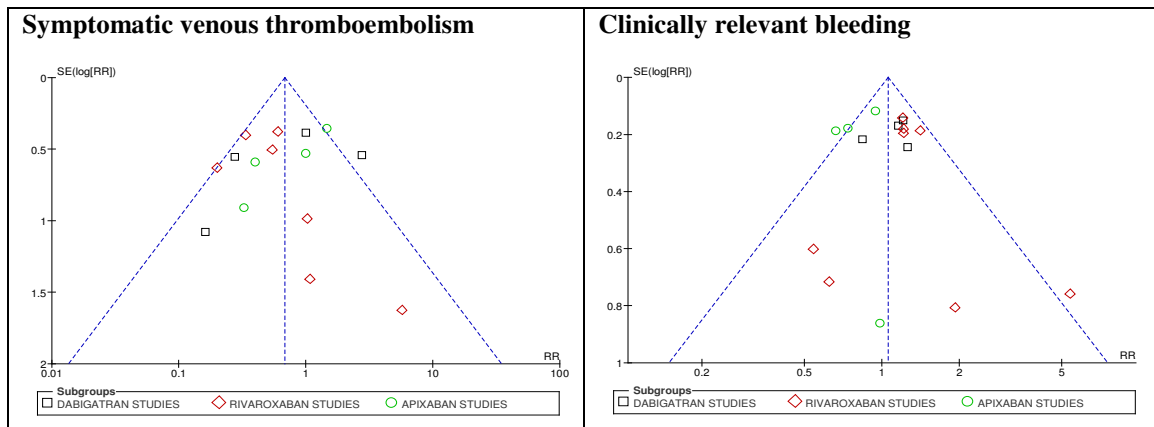

Supplement: goma002058.wf3_default.pdf [file goma002058.wf3_default.pdf]
